# Supplementary material for: Molecular electrostatic potentials of divalent carbon(0) compounds
Source: Royal Society of Chemistry journal article supplement (doi:10.1039/b803068e), 2008-01-01
Supplement: b803068e.pdf [file b803068e.pdf]

Supporting Material for

**"Molecular electrostatic potentials of divalent carbon(0) compounds"**

by M.M. Deshmukh, S.R. Gadre, R. Tonner, G. Frenking

**Table S1** Geometries and SCF energies of investigated molecules

|          |             |           |           |
|----------|-------------|-----------|-----------|
| <b>1</b> |             |           |           |
| 9        |             |           |           |
| E(SCF) = | -226.030912 |           |           |
| C        | -0.000008   | -1.286975 | 0.000059  |
| N        | -1.053597   | -0.404208 | 0.000332  |
| H        | -2.020495   | -0.728898 | 0.000923  |
| N        | 1.053592    | -0.404226 | -0.000409 |
| H        | 2.020505    | -0.728881 | -0.000483 |
| C        | -0.685606   | 0.941510  | -0.000933 |
| H        | -1.400799   | 1.770304  | -0.000040 |
| C        | 0.685617    | 0.941500  | 0.000727  |
| H        | 1.400805    | 1.770302  | 0.001016  |
| -----    |             |           |           |
| <b>2</b> |             |           |           |
| 9        |             |           |           |
| E(SCF) = | -724.115527 |           |           |
| C        | 0.000000    | 0.000000  | 0.713832  |
| P        | 0.000000    | 1.466791  | -0.073006 |
| P        | 0.000000    | -1.466791 | -0.073006 |
| H        | 0.000000    | 2.574721  | 0.834194  |
| H        | -1.088629   | 1.904551  | -0.940296 |
| H        | 1.088629    | 1.904551  | -0.940296 |
| H        | 0.000000    | -2.574721 | 0.834194  |
| H        | -1.088629   | -1.904551 | -0.940296 |
| H        | 1.088629    | -1.904551 | -0.940296 |
| -----    |             |           |           |
| <b>3</b> |             |           |           |
| 19       |             |           |           |
| E(SCF) = | -490.164355 |           |           |
| C        | 1.075562    | 2.471345  | 1.767275  |
| C        | 0.755340    | 1.255548  | 2.308906  |
| C        | 1.364631    | 2.728318  | 0.454093  |
| N        | 0.928477    | 0.865988  | 3.647620  |
| N        | 0.085791    | 0.130598  | 1.765074  |
| N        | 1.971419    | 1.931142  | -0.548710 |
| N        | 1.219405    | 3.959143  | -0.207680 |
| C        | 0.336580    | -0.364048 | 3.918150  |
| C        | -0.204363   | -0.819647 | 2.747127  |
| C        | 2.255198    | 2.675710  | -1.696148 |
| C        | 1.770680    | 3.937564  | -1.485247 |
| H        | 1.349468    | 1.503772  | 4.319837  |
| H        | 0.359965    | -0.825059 | 4.909639  |
| H        | -0.747974   | -1.745074 | 2.534196  |
| H        | -0.333476   | 0.163528  | 0.838304  |
| H        | 2.360393    | 1.016085  | -0.331657 |
| H        | 2.754665    | 2.248915  | -2.571155 |
| H        | 1.761155    | 4.808217  | -2.147081 |
| H        | 0.846512    | 4.768266  | 0.284407  |
| -----    |             |           |           |
| <b>4</b> |             |           |           |
| 5        |             |           |           |
| E(SCF) = | -264.559533 |           |           |
| C        | -0.005334   | 0.000000  | 0.159729  |
| C        | 0.006353    | 0.000000  | 1.449935  |
| C        | 0.017187    | 0.000000  | 2.740152  |
| O        | 0.027082    | 0.000000  | 3.916645  |
| O        | -0.015968   | 0.000000  | -1.016716 |
| -----    |             |           |           |
| <b>5</b> |             |           |           |
| 39       |             |           |           |
| E(SCF) = | -652.084895 |           |           |
| C        | -0.227019   | 0.045700  | 0.055863  |
| C        | -0.577232   | 0.089412  | -1.237230 |
| C        | 0.123738    | 0.005606  | 1.348915  |
| N        | 0.225494    | -0.421267 | -2.300490 |
| N        | -1.798017   | 0.652423  | -1.715725 |
| N        | 1.040579    | 0.914652  | 1.956641  |
| N        | -0.375489   | -0.950110 | 2.283228  |

|   |           |           |           |
|---|-----------|-----------|-----------|
| C | -0.419342 | -1.412218 | -3.161172 |
| H | 0.100625  | -1.465302 | -4.140646 |
| H | -1.472986 | -1.125968 | -3.329001 |
| H | -0.406720 | -2.436658 | -2.708559 |
| C | 1.594718  | -0.767889 | -1.974068 |
| H | 2.147106  | -0.989840 | -2.910088 |
| H | 1.676095  | -1.659911 | -1.302130 |
| H | 2.092326  | 0.080060  | -1.467817 |
| C | -2.810511 | 0.951268  | -0.722298 |
| H | -2.999261 | 0.062989  | -0.091160 |
| H | -3.755477 | 1.222877  | -1.235940 |
| H | -2.527926 | 1.796281  | -0.044104 |
| C | 0.529818  | 1.647965  | 3.114338  |
| H | 1.372252  | 2.019979  | 3.734416  |
| H | -0.099203 | 0.978353  | 3.727756  |
| H | -0.092803 | 2.529454  | 2.814681  |
| C | 1.818662  | 1.749656  | 1.062803  |
| H | 1.202923  | 2.515343  | 0.525810  |
| H | 2.320362  | 1.126685  | 0.299144  |
| H | 2.597186  | 2.281495  | 1.647234  |
| C | 0.636807  | -1.735960 | 2.987711  |
| H | 1.497938  | -1.090577 | 3.237040  |
| H | 1.012723  | -2.591236 | 2.369995  |
| H | 0.214056  | -2.152249 | 3.926069  |
| C | -1.507988 | -1.747909 | 1.856107  |
| H | -1.895773 | -2.322536 | 2.722108  |
| H | -1.254599 | -2.473921 | 1.042094  |
| H | -2.316339 | -1.092723 | 1.481620  |
| C | -1.657343 | 1.709867  | -2.716071 |
| H | -0.837209 | 1.454762  | -3.410877 |
| H | -1.421669 | 2.701571  | -2.251906 |
| H | -2.599100 | 1.818401  | -3.293852 |

-----  
**(H+)-1**

|          |             |           |           |
|----------|-------------|-----------|-----------|
| 10       |             |           |           |
| E(SCF) = | -226.449739 |           |           |
| C        | 0.069789    | -1.203752 | 0.000217  |
| N        | -1.031637   | -0.432938 | 0.000538  |
| H        | -1.992320   | -0.794635 | 0.000468  |
| N        | 1.127712    | -0.373739 | 0.000158  |
| H        | 2.106338    | -0.683581 | -0.000274 |
| C        | -0.676422   | 0.905813  | 0.000383  |
| H        | -1.416436   | 1.712344  | 0.000339  |
| C        | 0.700083    | 0.943239  | 0.000096  |
| H        | 1.394205    | 1.789640  | -0.000216 |
| H        | 0.099828    | -2.299065 | -0.000480 |

-----  
**(H+)-2**

|          |             |           |          |
|----------|-------------|-----------|----------|
| 10       |             |           |          |
| E(SCF) = | -724.536965 |           |          |
| C        | -0.000030   | 0.035627  | 1.195657 |
| P        | -1.535122   | -0.010082 | 1.969227 |
| P        | 1.535225    | -0.010317 | 1.968895 |
| H        | -0.000234   | -0.101785 | 0.101760 |
| H        | -2.514362   | 0.696544  | 1.216438 |
| H        | -1.503577   | 0.604179  | 3.253053 |
| H        | -2.195172   | -1.256909 | 2.242243 |
| H        | 1.502877    | 0.601096  | 3.254030 |
| H        | 2.196248    | -1.257211 | 2.239085 |
| H        | 2.514136    | 0.698857  | 1.217993 |

-----  
**(H+)-3**

|    |             |           |           |
|----|-------------|-----------|-----------|
| 20 |             |           |           |
|    | -490.644721 |           |           |
| C  | 1.017311    | 2.552947  | 1.806545  |
| C  | 0.700363    | 1.295610  | 2.356555  |
| C  | 1.344224    | 2.798719  | 0.458731  |
| N  | 0.637227    | 0.985155  | 3.691867  |
| N  | 0.368291    | 0.123598  | 1.709037  |
| N  | 1.693906    | 1.900085  | -0.527754 |
| N  | 1.401018    | 4.026022  | -0.152817 |
| C  | 0.249507    | -0.340907 | 3.877731  |

|   |           |           |           |
|---|-----------|-----------|-----------|
| C | 0.071592  | -0.881912 | 2.636992  |
| C | 1.994823  | 2.571993  | -1.718604 |
| C | 1.801950  | 3.902686  | -1.482205 |
| H | 0.884221  | 1.638243  | 4.436620  |
| H | 0.145440  | -0.784648 | 4.871666  |
| H | -0.228688 | -1.887868 | 2.331488  |
| H | 0.091657  | 0.091409  | 0.726288  |
| H | 1.976892  | 0.939030  | -0.328665 |
| H | 2.308220  | 2.044208  | -2.623396 |
| H | 1.903819  | 4.767372  | -2.143709 |
| H | 1.142232  | 4.899739  | 0.307436  |
| H | 1.009170  | 3.414637  | 2.486098  |

-----

**(H+)-4**

|          |             |          |           |
|----------|-------------|----------|-----------|
| 6        |             |          |           |
| E(SCF) = | -264.846645 |          |           |
| H        | -1.695664   | 0.103693 | 1.348650  |
| C        | 0.102691    | 0.039195 | 0.193924  |
| C        | -0.584189   | 0.068327 | 1.379336  |
| C        | 0.036769    | 0.055822 | 2.600855  |
| O        | 0.512053    | 0.046889 | 3.641205  |
| O        | 0.634200    | 0.016074 | -0.818629 |

-----

**(H+)-5**

|          |             |           |           |
|----------|-------------|-----------|-----------|
| 40       |             |           |           |
| E(SCF) = | -652.555884 |           |           |
| C        | 0.068097    | 0.027856  | -0.019596 |
| C        | -0.418217   | 0.054987  | -1.355760 |
| C        | 0.180363    | 1.093497  | 0.915537  |
| N        | 0.028625    | -0.883992 | -2.252287 |
| N        | -1.354729   | 0.954784  | -1.805874 |
| N        | 0.358046    | 2.407490  | 0.553421  |
| N        | 0.152302    | 0.813431  | 2.259345  |
| C        | -0.856572   | -1.508463 | -3.239636 |
| H        | -0.560428   | -1.269325 | -4.282494 |
| H        | -1.900035   | -1.188483 | -3.077576 |
| H        | -0.815235   | -2.611174 | -3.117240 |
| C        | 1.318692    | -1.548560 | -2.079596 |
| H        | 1.759766    | -1.749863 | -3.076876 |
| H        | 1.220764    | -2.521613 | -1.548907 |
| H        | 2.011103    | -0.901443 | -1.512302 |
| C        | -2.355414   | 1.546780  | -0.924679 |
| H        | -2.416800   | 0.975180  | 0.017967  |
| H        | -3.347746   | 1.514397  | -1.420929 |
| H        | -2.129358   | 2.609178  | -0.688938 |
| C        | -0.152630   | 3.521403  | 1.355408  |
| H        | 0.657227    | 4.085330  | 1.865490  |
| H        | -0.863474   | 3.150396  | 2.114171  |
| H        | -0.688635   | 4.233202  | 0.693485  |
| C        | 1.023220    | 2.792810  | -0.686484 |
| H        | 0.304931    | 3.166001  | -1.448103 |
| H        | 1.574775    | 1.932555  | -1.104731 |
| H        | 1.747910    | 3.607174  | -0.477337 |
| C        | 1.016084    | 1.503268  | 3.221883  |
| H        | 1.720897    | 2.170583  | 2.697030  |
| H        | 1.610998    | 0.749915  | 3.779736  |
| H        | 0.436014    | 2.095229  | 3.960493  |
| C        | -0.497300   | -0.390732 | 2.773022  |
| H        | -0.944879   | -0.167734 | 3.762755  |
| H        | 0.221326    | -1.229661 | 2.906457  |
| H        | -1.300822   | -0.715413 | 2.088213  |
| C        | -1.387967   | 1.430637  | -3.190594 |
| H        | -0.454497   | 1.154318  | -3.711160 |
| H        | -1.475867   | 2.537142  | -3.195036 |
| H        | -2.251624   | 1.025259  | -3.759658 |
| H        | 0.404768    | -0.953986 | 0.340658  |

-----

**(H+)2-1**

|          |             |           |           |
|----------|-------------|-----------|-----------|
| 11       |             |           |           |
| E(SCF) = | -226.537096 |           |           |
| C        | -0.000456   | -1.181503 | -0.000002 |

|   |           |           |           |
|---|-----------|-----------|-----------|
| N | -1.120188 | -0.259988 | -0.000114 |
| H | -2.113827 | -0.579534 | -0.000169 |
| N | 1.120035  | -0.260798 | 0.000009  |
| H | 2.113409  | -0.581088 | 0.000093  |
| C | -0.737258 | 0.990296  | 0.000022  |
| H | -1.424112 | 1.858701  | 0.000058  |
| C | 0.738004  | 0.989737  | -0.000026 |
| H | 1.425436  | 1.857688  | 0.000054  |
| H | -0.001507 | -1.850210 | 0.903309  |
| H | -0.000071 | -1.851239 | -0.902571 |

-----  
**(H+)2-2**

|          |             |           |           |
|----------|-------------|-----------|-----------|
| 11       |             |           |           |
| E(SCF) = | -724.733361 |           |           |
| C        | -0.132712   | 0.000030  | 1.100518  |
| P        | -0.867661   | -1.624784 | 1.610958  |
| P        | -0.867795   | 1.624760  | 1.610960  |
| H        | -0.093268   | 0.000046  | -0.014495 |
| H        | 0.925984    | 0.000046  | 1.452658  |
| H        | -0.048156   | -2.641321 | 1.042669  |
| H        | -2.196165   | -1.773144 | 1.122329  |
| H        | -0.875057   | -1.772578 | 3.026475  |
| H        | -0.048136   | 2.641353  | 1.042995  |
| H        | -0.875547   | 1.772461  | 3.026487  |
| H        | -2.196168   | 1.773131  | 1.121987  |

-----  
**(H+)2-3**

|          |             |           |           |
|----------|-------------|-----------|-----------|
| 21       |             |           |           |
| E(SCF) = | -490.893399 |           |           |
| C        | 0.843258    | 2.662179  | 1.879247  |
| C        | 0.540162    | 1.262103  | 2.352212  |
| C        | 1.325574    | 2.820654  | 0.458769  |
| N        | 0.999991    | 0.693411  | 3.491479  |
| N        | -0.312195   | 0.360412  | 1.808266  |
| N        | 2.396046    | 2.237182  | -0.132158 |
| N        | 0.819565    | 3.677158  | -0.459483 |
| C        | 0.442793    | -0.559685 | 3.673249  |
| C        | -0.391769   | -0.773793 | 2.598576  |
| C        | 2.567135    | 2.721128  | -1.418154 |
| C        | 1.563452    | 3.641454  | -1.625298 |
| H        | 1.648523    | 1.140818  | 4.151900  |
| H        | 0.677892    | -1.191920 | 4.537277  |
| H        | -1.025011   | -1.630612 | 2.341000  |
| H        | -0.850637   | 0.500449  | 0.945258  |
| H        | 3.017328    | 1.551415  | 0.312950  |
| H        | 3.375592    | 2.380546  | -2.075333 |
| H        | 1.326768    | 4.262086  | -2.497281 |
| H        | 0.013543    | 4.296327  | -0.304892 |
| H        | 1.596471    | 3.102013  | 2.568610  |
| H        | -0.064411   | 3.291523  | 2.005789  |

-----  
**(H+)2-4**

|          |             |           |           |
|----------|-------------|-----------|-----------|
| 7        |             |           |           |
| E(SCF) = | -264.882049 |           |           |
| C        | 0.148378    | 0.037282  | 0.147582  |
| C        | -0.668015   | 0.070851  | 1.377038  |
| C        | 0.079993    | 0.054697  | 2.649587  |
| O        | 0.576804    | 0.045000  | 3.657090  |
| O        | 0.699795    | 0.014153  | -0.830879 |
| H        | -1.316922   | 1.002927  | 1.352721  |
| H        | -1.375534   | -0.817770 | 1.363891  |

-----  
**(H+)2-5**

|          |             |           |           |
|----------|-------------|-----------|-----------|
| 41       |             |           |           |
| E(SCF) = | -652.807050 |           |           |
| C        | 0.153519    | -0.098415 | 0.023426  |
| C        | -0.419297   | 0.021003  | -1.386961 |
| C        | 0.239748    | 1.112443  | 0.949493  |
| N        | 0.142099    | -0.724325 | -2.359935 |
| N        | -1.510161   | 0.778586  | -1.619912 |
| N        | 0.614005    | 2.315446  | 0.469016  |
| N        | 0.022564    | 0.915741  | 2.265344  |

|   |           |           |           |
|---|-----------|-----------|-----------|
| C | -0.631514 | -1.270107 | -3.497009 |
| H | -0.400604 | -0.751632 | -4.448173 |
| H | -1.713015 | -1.224416 | -3.290758 |
| H | -0.347813 | -2.335167 | -3.607426 |
| C | 1.531175  | -1.225044 | -2.319539 |
| H | 1.923770  | -1.235508 | -3.354212 |
| H | 1.572558  | -2.260864 | -1.924101 |
| H | 2.193612  | -0.570446 | -1.726426 |
| C | -2.472509 | 1.145415  | -0.570273 |
| H | -2.286553 | 0.594001  | 0.365331  |
| H | -3.492990 | 0.879392  | -0.913106 |
| H | -2.450859 | 2.236681  | -0.376565 |
| C | 0.268345  | 3.594647  | 1.120239  |
| H | 1.135203  | 4.052055  | 1.636550  |
| H | -0.561883 | 3.457021  | 1.832449  |
| H | -0.061258 | 4.294691  | 0.327266  |
| C | 1.382336  | 2.480501  | -0.773939 |
| H | 0.776151  | 2.989742  | -1.549912 |
| H | 1.750520  | 1.515598  | -1.157969 |
| H | 2.269024  | 3.112433  | -0.563946 |
| C | 0.708942  | 1.699871  | 3.315727  |
| H | 1.579462  | 2.231881  | 2.899222  |
| H | 1.076295  | 0.982229  | 4.075345  |
| H | 0.027638  | 2.414383  | 3.817915  |
| C | -0.776136 | -0.199419 | 2.813193  |
| H | -1.297408 | 0.162852  | 3.719787  |
| H | -0.127972 | -1.051322 | 3.105082  |
| H | -1.552000 | -0.543394 | 2.106893  |
| C | -1.839622 | 1.345058  | -2.942931 |
| H | -0.955830 | 1.334754  | -3.601890 |
| H | -2.149886 | 2.397278  | -2.787754 |
| H | -2.679542 | 0.812967  | -3.431452 |
| H | -0.415544 | -0.898462 | 0.538650  |
| H | 1.172862  | -0.529527 | -0.043682 |

-----  
**BH3-1**

|          |             |           |          |
|----------|-------------|-----------|----------|
| 13       |             |           |          |
| E(SCF) = | -252.704911 |           |          |
| C        | 1.162688    | 0.811839  | 5.326949 |
| N        | 1.306774    | 0.006638  | 4.235704 |
| N        | 0.948399    | -0.072785 | 6.342561 |
| B        | 1.274493    | 2.393071  | 5.405575 |
| H        | 0.931213    | 2.871330  | 4.317872 |
| H        | 2.473210    | 2.646226  | 5.615917 |
| H        | 0.589948    | 2.794280  | 6.354241 |
| C        | 0.969900    | -1.392467 | 5.907560 |
| C        | 1.199850    | -1.341495 | 4.555594 |
| H        | 1.473841    | 0.398923  | 3.307730 |
| H        | 1.285487    | -2.140198 | 3.813825 |
| H        | 0.815790    | -2.244319 | 6.575454 |
| H        | 0.794828    | 0.248432  | 7.299728 |

-----  
**BH3-2**

|          |             |           |           |
|----------|-------------|-----------|-----------|
| 13       |             |           |           |
| E(SCF) = | -750.760546 |           |           |
| C        | 0.099857    | -0.449569 | -0.057058 |
| P        | 1.410142    | -0.032175 | 0.928679  |
| P        | -0.099607   | 0.057016  | -1.659020 |
| B        | -1.330599   | -0.166840 | 0.787808  |
| H        | -1.056393   | 0.477215  | 1.822703  |
| H        | -1.867168   | -1.247394 | 1.057017  |
| H        | -2.072469   | 0.547582  | 0.080520  |
| H        | 2.735772    | -0.206582 | 0.399864  |
| H        | 1.441004    | -0.837817 | 2.104575  |
| H        | 1.525635    | 1.278667  | 1.532094  |
| H        | 1.007044    | -0.106300 | -2.562293 |
| H        | -0.526924   | 1.400443  | -1.988168 |
| H        | -1.132944   | -0.684699 | -2.303201 |

-----  
**BH3-3**

|        |              |  |  |
|--------|--------------|--|--|
| 23     |              |  |  |
| E(SCF) | -516.8480481 |  |  |

|   |             |             |             |
|---|-------------|-------------|-------------|
| C | 1.05301711  | 2.53311605  | 1.77335458  |
| C | 0.76469029  | 1.26214072  | 2.27929843  |
| C | 1.3211941   | 2.72513683  | 0.41596943  |
| N | 0.67414197  | 0.99422248  | 3.62606471  |
| N | 0.48989751  | 0.03974708  | 1.65556709  |
| N | 1.49814201  | 1.82645908  | -0.64281226 |
| N | 1.51281379  | 3.9682553   | -0.14624145 |
| C | 0.32863344  | -0.328151   | 3.85071698  |
| C | 0.18392709  | -0.92720312 | 2.62836741  |
| C | 1.88592631  | 2.52909193  | -1.79628904 |
| C | 1.877585    | 3.86037272  | -1.47938685 |
| H | 0.89065449  | 1.76637871  | 4.27491017  |
| H | 0.22448971  | -0.74524534 | 4.85625541  |
| H | -0.08100833 | -1.95524762 | 2.36677211  |
| H | 0.12215582  | 0.0071494   | 0.70318964  |
| H | 1.76675804  | 0.85631503  | -0.46634014 |
| H | 2.0883448   | 2.02520568  | -2.74549378 |
| H | 2.0702745   | 4.73502762  | -2.10705576 |
| H | 1.54267453  | 4.77275466  | 0.49896243  |
| B | 1.05542972  | 3.80972219  | 2.80228994  |
| H | 1.76386039  | 4.73742166  | 2.34625024  |
| H | -0.09954472 | 4.22764283  | 2.98755148  |
| H | 1.5498173   | 3.46926865  | 3.90571565  |

**BH3-4**

|          |             |           |           |
|----------|-------------|-----------|-----------|
| 9        |             |           |           |
| E(SCF) = | -291.149278 |           |           |
| C        | 0.287417    | -0.000037 | 0.258991  |
| C        | -0.220312   | 0.000005  | 1.490460  |
| C        | 0.383005    | 0.000050  | 2.677207  |
| O        | 0.792863    | 0.000101  | 3.765721  |
| O        | 0.643565    | -0.000072 | -0.848872 |
| B        | -2.031839   | -0.000006 | 1.455617  |
| H        | -2.260424   | 0.000098  | 0.246705  |
| H        | -2.313349   | -1.051029 | 2.015697  |
| H        | -2.313372   | 1.050890  | 2.015919  |

**BH3-5**

|          |             |           |           |
|----------|-------------|-----------|-----------|
| 43       |             |           |           |
| E(SCF) = | -678.724100 |           |           |
| C        | 0.093867    | -0.332439 | 0.014769  |
| C        | -0.341552   | 0.026557  | -1.294335 |
| C        | 0.196234    | 0.696489  | 0.984230  |
| N        | 0.182844    | -0.539194 | -2.438301 |
| N        | -1.395919   | 0.905520  | -1.520328 |
| N        | 0.556393    | 2.014867  | 0.667434  |
| N        | 0.054162    | 0.471497  | 2.339590  |
| C        | -0.661718   | -1.016175 | -3.527141 |
| H        | -0.425056   | -0.524325 | -4.497362 |
| H        | -1.725595   | -0.843023 | -3.288956 |
| H        | -0.515168   | -2.111465 | -3.654229 |
| C        | 1.563258    | -0.993966 | -2.503964 |
| H        | 2.030992    | -0.618164 | -3.442115 |
| H        | 1.629617    | -2.101369 | -2.477147 |
| H        | 2.122294    | -0.615723 | -1.630749 |
| C        | -2.468308   | 1.088398  | -0.555722 |
| H        | -2.429207   | 0.281834  | 0.197006  |
| H        | -3.452313   | 1.050474  | -1.075290 |
| H        | -2.404889   | 2.068400  | -0.031460 |
| C        | -0.016194   | 3.159878  | 1.357589  |
| H        | 0.742116    | 3.738756  | 1.935122  |
| H        | -0.803846   | 2.825690  | 2.056332  |
| H        | -0.477375   | 3.863014  | 0.626425  |
| C        | 1.441562    | 2.349260  | -0.431337 |
| H        | 0.904859    | 2.780913  | -1.307829 |
| H        | 1.979434    | 1.444897  | -0.765212 |
| H        | 2.189378    | 3.105445  | -0.098645 |
| C        | 0.920682    | 1.097728  | 3.327480  |
| H        | 1.729303    | 1.657520  | 2.824944  |
| H        | 1.384887    | 0.310742  | 3.961278  |
| H        | 0.373783    | 1.794445  | 4.003930  |
| C        | -0.881903   | -0.513111 | 2.863530  |

|   |           |           |           |
|---|-----------|-----------|-----------|
| H | -1.721800 | -0.008919 | 3.396758  |
| H | -0.370326 | -1.189438 | 3.578721  |
| H | -1.261799 | -1.147019 | 2.040706  |
| C | -1.477698 | 1.759434  | -2.697139 |
| H | -0.533756 | 1.704259  | -3.268344 |
| H | -1.640298 | 2.816422  | -2.388874 |
| H | -2.317069 | 1.480512  | -3.374823 |
| B | 0.313255  | -1.929932 | 0.383978  |
| H | 1.045913  | -2.043961 | 1.380475  |
| H | -0.806690 | -2.440065 | 0.625293  |
| H | 0.787286  | -2.559975 | -0.571898 |

-----  
**(BH3)2-2**

|          |             |           |           |
|----------|-------------|-----------|-----------|
| 17       |             |           |           |
| E(SCF) = | -777.399488 |           |           |
| C        | -0.091552   | 0.000474  | 0.982621  |
| P        | -0.770183   | -1.525635 | 1.516479  |
| P        | -0.778439   | 1.512337  | 1.545591  |
| B        | -0.431418   | 0.041754  | -0.680661 |
| H        | -0.426411   | 1.239640  | -1.020496 |
| H        | -1.575129   | -0.418962 | -0.869298 |
| H        | 0.440447    | -0.599860 | -1.263643 |
| B        | 1.458674    | -0.027896 | 1.675449  |
| H        | 1.805333    | -1.222254 | 1.736383  |
| H        | 1.388993    | 0.424093  | 2.836045  |
| H        | 2.209800    | 0.627531  | 0.955838  |
| H        | -0.153156   | -2.541177 | 0.747227  |
| H        | -2.170868   | -1.754951 | 1.319615  |
| H        | -0.555775   | -1.914703 | 2.875456  |
| H        | 0.094286    | 2.543182  | 1.121768  |
| H        | -0.894016   | 1.724990  | 2.957867  |
| H        | -2.062716   | 1.891337  | 1.044431  |

-----  
**(BH3)2-3**

|        |              |             |             |
|--------|--------------|-------------|-------------|
| 27     |              |             |             |
| E(SCF) | -543.4643208 |             |             |
| C      | 1.26424202   | 2.48521783  | 1.90253124  |
| C      | 0.61249058   | 1.22633429  | 2.28240977  |
| C      | 1.52830816   | 2.61212078  | 0.45768538  |
| N      | 1.00599885   | 0.46178911  | 3.32588592  |
| N      | -0.53312201  | 0.64636515  | 1.8189207   |
| N      | 2.66661633   | 2.25581051  | -0.18678372 |
| N      | 0.76322736   | 3.24197785  | -0.46519136 |
| C      | 0.10641509   | -0.56550658 | 3.55956286  |
| C      | -0.87333373  | -0.45123466 | 2.60302424  |
| C      | 2.6282445    | 2.66705082  | -1.50727798 |
| C      | 1.41395964   | 3.29446053  | -1.68654228 |
| H      | 1.84797088   | 0.79586552  | 3.83917201  |
| H      | 0.2338892    | -1.29194684 | 4.36636478  |
| H      | -1.76584761  | -1.05454402 | 2.41633246  |
| H      | -1.1365949   | 1.12828418  | 1.14907222  |
| H      | 3.4348962    | 1.8819375   | 0.40268199  |
| H      | 3.45259837   | 2.49794277  | -2.20565657 |
| H      | 0.98168419   | 3.77287617  | -2.5695889  |
| H      | -0.11869842  | 3.66854225  | -0.119357   |
| B      | 0.03995512   | 3.6322868   | 2.27015186  |
| H      | 0.49878662   | 4.76502167  | 2.10508923  |
| H      | -0.9118719   | 3.41831049  | 1.4447287   |
| H      | -0.4024397   | 3.44652038  | 3.40488813  |
| B      | 2.76528529   | 2.56868633  | 2.66756394  |
| H      | 2.65395837   | 2.31164334  | 3.88527231  |
| H      | 3.51725435   | 1.67791239  | 2.16661505  |
| H      | 3.27183238   | 3.67902167  | 2.51723109  |

-----  
**(BH3)2-4**

|          |             |           |           |
|----------|-------------|-----------|-----------|
| 13       |             |           |           |
| E(SCF) = | -317.729243 |           |           |
| C        | 1.211688    | 0.000177  | -0.481750 |
| C        | 0.000206    | 0.001902  | 0.111533  |
| C        | -1.210672   | -0.004489 | -0.482960 |
| O        | -2.299077   | -0.029817 | -0.870840 |
| O        | 2.300530    | 0.021363  | -0.868640 |



|   |           |           |          |
|---|-----------|-----------|----------|
| B | -0.011834 | 1.616184  | 1.140392 |
| B | 0.009905  | -1.605986 | 1.154371 |
| H | 0.704809  | 1.264189  | 2.060780 |
| H | 0.399962  | 2.448967  | 0.346944 |
| H | -1.207483 | 1.682356  | 1.402627 |
| H | 1.205225  | -1.670504 | 1.418175 |
| H | -0.707878 | -1.245696 | 2.070566 |
| H | -0.401671 | -2.444188 | 0.366557 |

-----  
**(BH3)2-5**

|          |             |           |           |
|----------|-------------|-----------|-----------|
| 47       |             |           |           |
| E(SCF) = | -705.316749 |           |           |
| C        | -0.159263   | -0.368310 | 0.067795  |
| C        | -0.497662   | 0.067935  | -1.292222 |
| C        | -0.003961   | 0.716115  | 1.044581  |
| N        | -0.067454   | -0.541649 | -2.438347 |
| N        | -1.402295   | 1.092109  | -1.506787 |
| N        | 0.636492    | 1.893834  | 0.704141  |
| N        | -0.351805   | 0.635165  | 2.364678  |
| C        | -1.020780   | -0.898163 | -3.490637 |
| H        | -0.778614   | -0.419044 | -4.464368 |
| H        | -2.048135   | -0.631073 | -3.191461 |
| H        | -0.989625   | -2.000034 | -3.627381 |
| C        | 1.214983    | -1.226463 | -2.572641 |
| H        | 1.672982    | -0.933452 | -3.542695 |
| H        | 1.075526    | -2.327646 | -2.561548 |
| H        | 1.885336    | -0.967889 | -1.736427 |
| C        | -2.374698   | 1.528880  | -0.512639 |
| H        | -2.524403   | 0.723628  | 0.228239  |
| H        | -3.348404   | 1.709742  | -1.015426 |
| H        | -2.067551   | 2.474444  | -0.014301 |
| C        | 0.387458    | 3.148097  | 1.407399  |
| H        | 1.242599    | 3.465942  | 2.044385  |
| H        | -0.510825   | 3.058188  | 2.043137  |
| H        | 0.211725    | 3.951792  | 0.660309  |
| C        | 1.541287    | 2.019398  | -0.431679 |
| H        | 1.059426    | 2.526815  | -1.295937 |
| H        | 1.908091    | 1.017625  | -0.717108 |
| H        | 2.420395    | 2.626352  | -0.127460 |
| C        | 0.595819    | 1.034867  | 3.406545  |
| H        | 1.553397    | 1.351607  | 2.960373  |
| H        | 0.802685    | 0.149646  | 4.044862  |
| H        | 0.198699    | 1.846654  | 4.054300  |
| C        | -1.455977   | -0.172125 | 2.874916  |
| H        | -2.021944   | 0.431280  | 3.618015  |
| H        | -1.075616   | -1.087990 | 3.373514  |
| H        | -2.118372   | -0.491925 | 2.053610  |
| C        | -1.400355   | 1.891200  | -2.727861 |
| H        | -0.470601   | 1.716910  | -3.297419 |
| H        | -1.450165   | 2.967284  | -2.454976 |
| H        | -2.268014   | 1.674571  | -3.389954 |
| B        | 1.303703    | -1.262352 | 0.502125  |
| H        | 2.309869    | -0.604069 | 0.164224  |
| H        | 1.287624    | -1.391272 | 1.728503  |
| H        | 1.281200    | -2.359055 | -0.046027 |
| B        | -1.358620   | -1.663046 | 0.185557  |
| H        | -1.122601   | -2.338812 | 1.181348  |
| H        | -2.504275   | -1.167814 | 0.232025  |
| H        | -1.244904   | -2.344061 | -0.836342 |

-----

**Figure S1.** MESP isosurfaces of **1-BH<sub>3</sub> - 5-BH<sub>3</sub>** at the MP2/6-311G(2d,2p)//BP86/SVP level of theory.

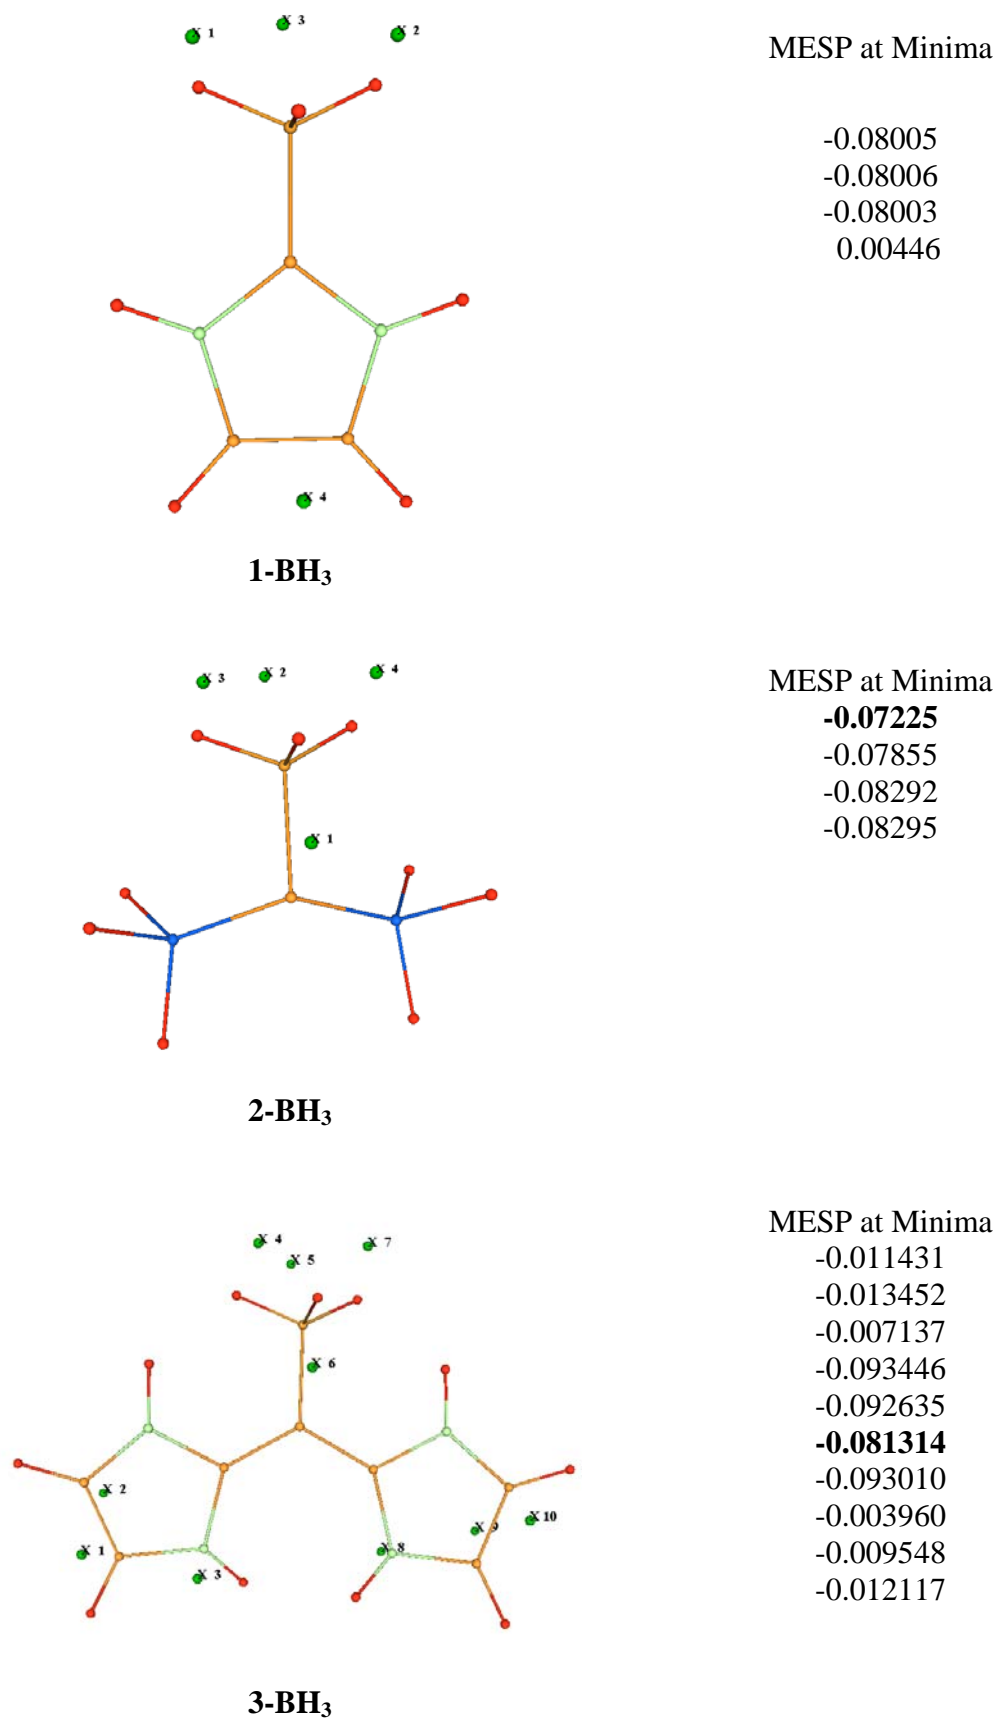

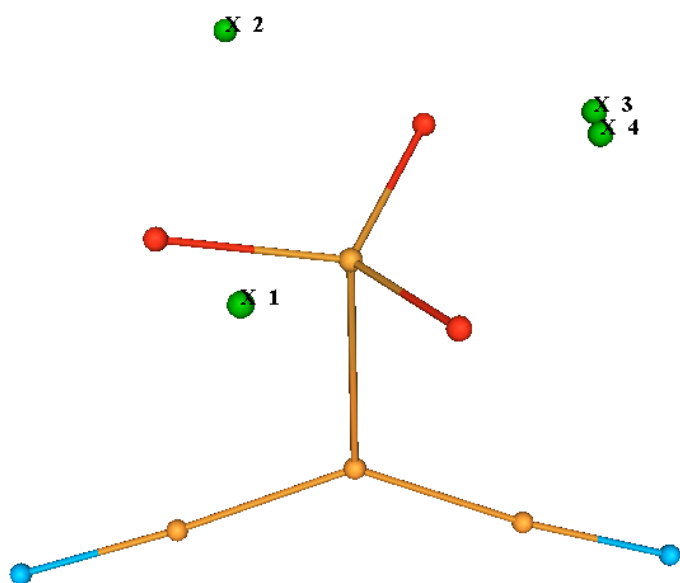

MESP at Minima

-0.04568  
 -0.04568  
 -0.04455  
 -0.04455

**4-BH<sub>3</sub>**

MESP topography, a (3,+3) minima at central carbon atom is absent.

0.00 kcal/mol

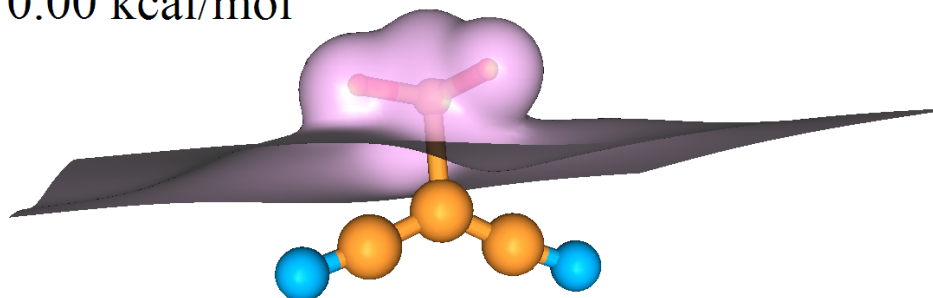

**4-BH<sub>3</sub>**

MESP isosurface of 0.00 kcal/mol suggesting no negative valued MESP region near central carbon atom

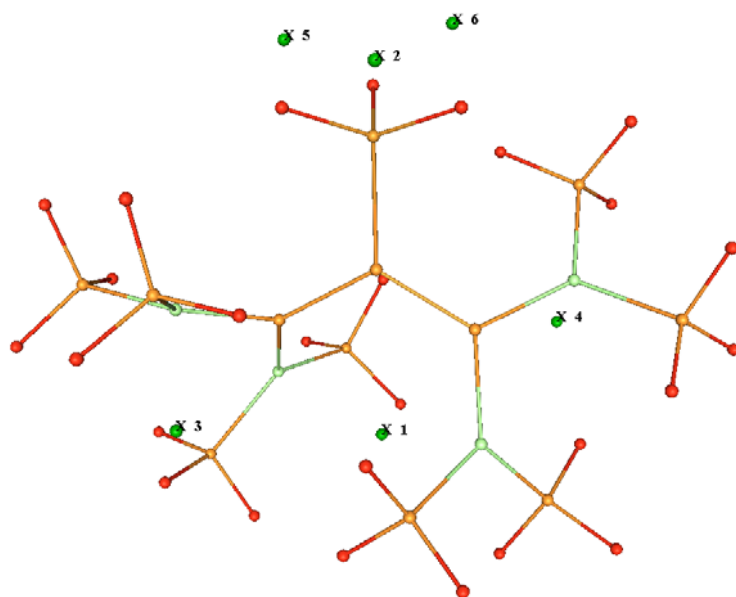

MESP at Minima

-0.00589  
 -0.10760  
 -0.00001  
 0.00044  
 -0.10692  
 -0.10360

5

MESP topography, non (3,+3) minima at central carbon atom

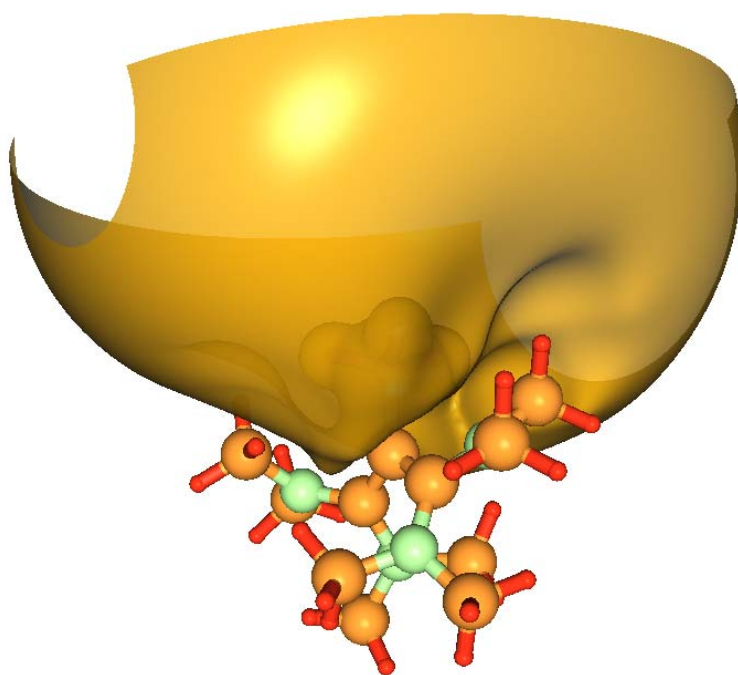

-4.26 kcal/mol

5

MESP isosurface of -4.26 kcal/mol suggesting that though a (3,+3) minima not seen near central carbon atom, the smaller negative valued MESP region at central carbon would be responsible for smaller binding energy of second BH3 adduct.
